# Supplementary material for: Hemagglutinin Gene Variation Rate of H9N2 Avian Influenza Virus by Vaccine Intervention in China
Source: MDPI journal article supplement (doi:10.3390/v14051043), 2022-05-13
Supplement: s1 [file s1]

**Table S1.** Basic information of H9N2 avian influenza vaccine strains in China.

| No | Abbreviation | Strains                            | Analyzed | Approval date |
|----|--------------|------------------------------------|----------|---------------|
| 1  | F            | A/Chicken/Shanghai/F/98            | Yes      | 2002.4        |
| 2  | SS           | A/Chicken/Guangdong/SS/94          | Yes      | 2003.9.2      |
| 3  | SD696        | A/Chicken/Shandong/6/96            | Yes      | 2004.1.19     |
| 4  | HL           | A/Chicken/Henan Luo-yang/HL/2001   | Yes      | 2006.9.30     |
| 5  | SY           | A/Chicken/Shanxi/SY/97             | Yes      | 2006.4.25     |
| 6  | SS/94        | A/Chicken/Guangdong/ss/94          | Yes      | 2007.6.1      |
| 7  | Re-2         | A/chicken/Guangxi/10/1999          | Yes      | 2007.2.9      |
| 8  | YBF003       | A/Chicken/Shandong/11/05           | Yes      | 2009.7.21     |
| 9  | WD           | A/Chicken/Hebei/WD/98              | Yes      | 2009.3.6      |
| 10 | HP           | A/Chicken/Henan Puyang/2/98        | Yes      | 2009.3.6      |
| 11 | L            | A/Chicken/Shandong/1/2002          | Yes      | 2009.3.6      |
| 12 | HN106        | A/Chicken/Henan/01/2006            | Yes      | 2010.12.7     |
| 13 | JY           | A/Chicken/Jiangsu/JY/99            | Yes      | 2010.11.30    |
| 14 | NJ02         | A/Chicken/NanJing/02/2001          | Yes      | 2010.8.27     |
| 15 | H2           | /                                  | No       | /             |
| 16 | LG1          | A/Chicken/Shandong/LG1/2000        | No       | 2010.1.11     |
| 17 | S2           | A/Chicken/Shandong/S2/2005         | Yes      | 2011.1.21     |
| 18 | HZ           | A/Chicken/Henan Zheng-zhou/HZ/2001 | Yes      | 2011.3.18     |
| 19 | NJ01         | A/Duck/Nanjing/01/1999             | Yes      | 2013.5.6      |
| 20 | SZ           | A/Chinken/shanghai/10101           | Yes      | 2015.6.25     |
| 21 | Re-9         | /                                  | No       | 2015.11.18    |
| 22 | JD           | A/Chicken/Shandong/JD/2010         | Yes      | 2017.8.31     |
| 23 | HN03         | A/Chicken/Henan/03/2009            | No       | 2017.5.23     |
| 24 | WJ57         | A/Chicken/Hebei/WJ57/2012          | Yes      | 2018.10.15    |
| 25 | G            | A/Chicken/Hebei/G/2012             | Yes      | 2019.4.16     |
| 26 | YBF13        | /                                  | Yes      | 2021.6.29     |
| 27 | YT           | A/Chicken/Hebei/YT/2010            | No       | 2021.8.29     |
| 28 | SH           | /                                  | No       | /             |

\*"/" indicates that information is not available.

**Table S2.** Detailed distribution of H9N2 subtype AIVs in different countries or cities.

| <b>Global Countries</b> | <b>Counts</b> | <b>Provinces in mainland China</b> | <b>Counts</b> |
|-------------------------|---------------|------------------------------------|---------------|
| China                   | 1461          | Guangdong                          | 195           |
| Vietnam                 | 282           | Jiangxi                            | 175           |
| Bangladesh              | 134           | Shandong                           | 162           |
| United States           | 82            | Jiangsu                            | 161           |
| Cambodia                | 64            | Zhejiang                           | 150           |
| Pakistan                | 55            | Hunan                              | 121           |
| Egypt                   | 53            | Hong Kong                          | 59            |
| Israel                  | 42            | Shanghai                           | 54            |
| Japan                   | 38            | Guangxi                            | 51            |
| Laos                    | 25            | Anhui                              | 42            |
| Jordan                  | 18            | Fujian                             | 41            |
| South Korea             | 17            | Hubei                              | 41            |
| Netherlands             | 12            | NA                                 | 41            |
| Saudi Arabia            | 10            | Jilin                              | 22            |
| Iran                    | 8             | Hebei                              | 21            |
| Afghanistan             | 7             | Beijing                            | 20            |
| Chile                   | 6             | Yunnan                             | 20            |
| India                   | 5             | Henan                              | 12            |
| Russia                  | 5             | Sichuan                            | 8             |
| Sweden                  | 5             | Chongqing                          | 6             |
| Argentina               | 3             | Shanxi                             | 4             |
| Belgium                 | 3             | Gansu                              | 3             |
| Canada                  | 3             | Guizhou                            | 3             |
| Ghana                   | 3             | Liaoning                           | 3             |
| Iraq                    | 3             | Shaanxi                            | 3             |
| Morocco                 | 3             | Tianjin                            | 3             |
| Poland                  | 3             | Tibet                              | 3             |
| Portugal                | 3             | Heilongjiang                       | 2             |
| Lebanon                 | 2             | NeiMenggu                          | 2             |
| United Arab Emirates    | 2             | Ningxia                            | 2             |
| Burkina Faso            | 1             | Hainan                             | 1             |
| Germany                 | 1             | Oman                               | 1             |
| Indonesia               | 1             | Xinjiang                           | 1             |
| Malaysia                | 1             | Qinghai                            | 0             |
| Mexico                  | 1             | /                                  | /             |
| NA                      | 1             | /                                  | /             |

\*"/" indicates that information is not available.
